# Supplementary material for: An investigation into the effect of mixing on the secondary nucleation of sodium chlorate in a stirred tank and an oscillatory baffled crystallizer
Source: Royal Society of Chemistry journal article supplement (doi:10.1039/c3ce41467a), 2013-10-25
Supplement: c3ce41467a.xlsx [file c3ce41467a.xlsx]

## Sheet: All data
Scraped OBC								Un-Scraped OBC
Oscillatory Frequency, f (Hz)	Oscillatotory amplitude Xo (mm)	Seed handedness	Number of left handed crystals, NL	Number of right handed crystals, NR	Total number of crystals, NT	Similarity to seed (%)		f (Hz)	Xo (mm)	Seed	NL	NR	NT	Similarity to seed (%)
0.4	15	L	1336	85	1421	94.0183		0.8	15	L	1661	0	1661	100
0.4	15	L	1487	80	1567	94.8947		0.8	15	L	1416	44	1460	96.9863
0.4	15	R	44	1147	1191	96.3056		0.8	15	L	10395	13	10408	99.8751
1	15	L	4156	42	4198	98.9995		3	15	R	20	4778	4798	99.5832
1	15	L	4222	297	4519	93.4277		3	15	L	586	1	587	99.8296
1	15	R	337	4409	4746	92.8993		3	15	R	140	14030	14170	99.012
1.6	15	L	4678	347	5025	93.0945		2	15	L	1045	12	1057	98.8647
1.6	15	R	381	3627	4008	90.494		2	15	R	17	3293	3310	99.4864
1.6	15	R	324	4444	4768	93.2047		2	15	R	26	1966	1992	98.6948
2	15	R	167	2260	2427	93.1191		2	7.5	L	5362	2	5364	99.9627
2	15	R	223	3020	3243	93.1237		2	7.5	L	1604	1	1605	99.9377
2	15	L	6973	459	7432	93.824		2	7.5	L	1550	9	1559	99.4227
2	7.5	L	1935	37	1972	98.1237		2	3.5	L	4517	0	4517	100
2	7.5	L	939	42	981	95.7187		2	3.5	L	989	0	989	100
2	7.5	R	19	1163	1182	98.3926		2	3.5	L	2851	0	2851	100
2	3.5	L	1817	40	1857	97.846
2	3.5	L	6568	0	6568	100
2	3.5	L	3250	3	3253	99.9078
Scraped STC								Un-Scraped STC
Stirrer speed, Ns (RPM)	Seed	NL	NR	NT	Similarity to seed (%)			Ns (RPM)	Seed	NL	NR	NT	Similarity to seed (%)
65	L	2522	201	2723	92.6184			65	L	1089	0	1089	100
65	L	3351	191	3542	94.6076			65	R	0	569	569	100
65	L	80	1	81	98.7654			65	L	1162	0	1162	100
145	L	7213	0	7213	100			145	L	2594	0	2594	100
145	L	3943	39	3982	99.0206			145	L	331	0	331	100
145	L	5989	504	6493	92.2378			145	L	816	0	816	100
258	L	5905	161	6066	97.3459			258	L	1860	0	1860	100
258	L	3610	246	3856	93.6203			258	R	0	2690	2690	100
258	L	4802	183	4985	96.329			258	R	0	854	854	100
